# Supplementary material for: miR-497 defect contributes to gastric cancer tumorigenesis and progression via regulating CDC42/ITGB1/FAK/PXN/AKT signaling
Source: PubMed Central journal article supplement — Mol Ther Nucleic Acids. 2021 Aug 8;25:567–77. doi: 10.1016/j.omtn.2021.07.025 (PMC8463315; doi:10.1016/j.omtn.2021.07.025), 2021-08-08
Supplement: mmc1.pdf [file mmc1.pdf]

**Supplemental information**

**miR-497 defect contributes to gastric cancer  
tumorigenesis and progression via regulating  
CDC42/ITGB1/FAK/PXN/AKT signaling**

**Lihui Zhang, Liwen Yao, Wei Zhou, Jinping Tian, Banlai Ruan, Zihua Lu, Yunchao Deng, Qing Li, Zhi Zeng, Dongmei Yang, Renduo Shang, Ming Xu, Mengjiao Zhang, Du Cheng, Yanning Yang, Qianshan Ding, and Honggang Yu**

## Construction of miRNA 497 knockout (KO) C57BL/6 mice by CRISPR/Cas9-mediated genome engineering

### Summary:

The mouse mi-RNA 497 gene (mi-RNA Base: MI0004636; Ensembl: ENSMUSG00000105220) is located on mouse chromosome 11. 5P and 3P of mouse mi-RNA 497 were selected as target site. Cas9 mRNA and gRNA generated by *in vitro* transcription were then injected into fertilized eggs for KO mouse productions. The founders were genotyped by PCR followed by DNA sequencing analysis. The positive founders were breeding to the next generation which was genotyped by PCR and DNA sequencing analysis.

### Results

Injected mRNA was named as Mouse miRNA-497-gRNA3(VB160318-1030dzc) and Mouse miRNA-497-gRNA4(VB160318-1031ady) (Table S1, 2). The generation of founder 0 and 1 was showed in Table S3.

**Table S1. Summary of VB160318-1030dzc.**

|                             |                                                |
|-----------------------------|------------------------------------------------|
| Vector ID                   | VB160318-1030dzc                               |
| Vector Name (official)      | pRP[CRISPR]-hCas9-U6>20nt_GCCTGCTAAACTACTTTTGC |
| Date Created (Pacific Time) | 2016-03-17                                     |
| Size                        | 8507 bp                                        |
| Vector Type                 | Regular plasmid CRISPR vector (single gRNA)    |
| Inserted gRNA               | 20nt_GCCTGCTAAACTACTTTTGC                      |
| Inserted Nuclease           | hCas9                                          |
| Target Sequence             | GCCTGCTAAACTACTTTTGC                           |

|                      |            |
|----------------------|------------|
| Copy Number          | High       |
| Bacterial Resistance | Ampicillin |
| Cloning Host         | Stbl3      |

**Table S2. Summary of VB160318-1031ady.**

|                             |                                                |
|-----------------------------|------------------------------------------------|
| Vector ID                   | VB160318-1031ady                               |
| Vector Name (official)      | pRP[CRISPR]-hCas9-U6>20nt_GTTGTCTGATACCAGTTATC |
| Date Created (Pacific Time) | 2016-03-17                                     |
| Size                        | 8507 bp                                        |
| Vector Type                 | Regular plasmid CRISPR vector (single gRNA)    |
| Inserted gRNA               | 20nt_GTTGTCTGATACCAGTTATC                      |
| Inserted Nuclease           | hCas9                                          |
| Target Sequence             | GTTGTCTGATACCAGTTATC                           |
| Copy Number                 | High                                           |
| Bacterial Resistance        | Ampicillin                                     |
| Cloning Host                | Stbl3                                          |

**Table S3. Founder generation.**

| Founder generation      |                                                                               |   |                          |
|-------------------------|-------------------------------------------------------------------------------|---|--------------------------|
| Name of Injected mRNA   | Mouse Mir497-gRNA3(VB160318-1030dzc)/<br>Mouse Mir497-gRNA4(VB160318-1031ady) |   |                          |
| Mouse Strain            | C57BL/6                                                                       |   |                          |
| Date of Birth           | 2016-08-13                                                                    |   |                          |
| Founders (F0) Generated | ♂                                                                             | 2 | Mouse-ID#17, Mouse-ID#19 |
| Mouse Strain            | C57BL/6(Mouse-ID#17) × C57BL/6(WT)                                            |   |                          |
| Date of Birth           | 2016-10-27                                                                    |   |                          |
| Founders (F1) Generated | ♂                                                                             | 2 | Mouse-ID#7               |
|                         | ♀                                                                             | 1 | Mouse-ID#10, Mouse-ID#11 |
| Mouse Strain            | C57BL/6(Mouse-ID#19) × C57BL/6(WT)                                            |   |                          |
| Date of Birth           | 2016-10-28                                                                    |   |                          |
| Founders (F1) Generated | ♂                                                                             | 2 | Mouse-ID#19, Mouse-ID#23 |

|  |   |   |             |
|--|---|---|-------------|
|  | ♀ | 1 | Mouse-ID#25 |
|--|---|---|-------------|

1. **F0 founder screening:** The PCR products were generated from PCR genotyping using the primers and conditions listed below (Fig. 1). The amplicons were then purified and sent for DNA sequencing analysis. DNA sequencing using the primer listed below revealed that Mouse-ID#17 was missing 409 bases in one strand; Mouse-ID#19 was missing 411 bases in one strand.

- Mouse Mir497-F: 5'-CACCACCTCTGGACTGCCAACTC-3'
- Mouse Mir497-R: 5'-CGTTCCTGATAACCATGTGCCCT-3'
- Product Size: WT: 979 bp, MT: ~580 bp, delete: ~400 bp
- Annealing Temp: 58°C
- DNA Sequencing Primer (Forward Sequencing):  
5'-GCCCTGTGTCTTCCAGCATTTC-3'

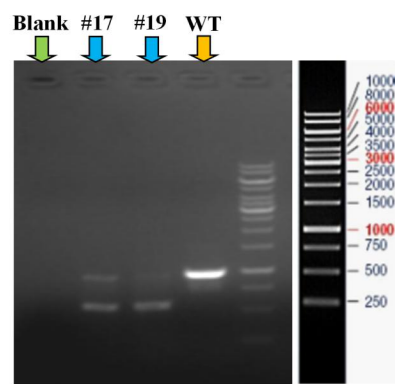

Fig.1. F0 founder PCR screening

2. **F1 founder screening:** The PCR products were generated from PCR genotyping using the primers and conditions listed above (Fig.2). The amplicons were then purified and sent for DNA sequencing analysis. DNA sequencing revealed that Mouse-ID#7, #10, #11 were missing 409 bases in one strand; Mouse-ID#19, #23, #25 were missing 411 bases in one strand (See extended data and attachment).

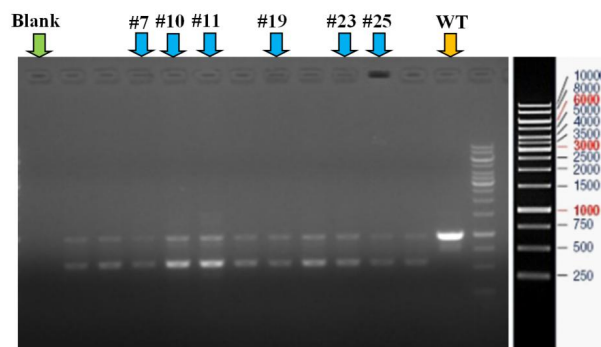

Fig.2. F1 founder PCR screening

**Extended Data:**

The deletion sequence is in black and the 5P and 3P of Mouse Mir497 are over-striking.

Mouse Mir497 sequence:

cctgccccgccc**cagcagcactgtggttgtacggcactgtggccacgtcca**aaccacactgtgggttagagcgagggtta

ID#17-F1-Mouse-ID#7, #10, #11:

tttctggttctgattgtccccccccagctttttggggggccatgttgccattcacacctgtctcactctaggtgggggtcttcacggcactg  
cctgtgtgtcttctctcgaccaccccagctctgccccgccc**cagcagcactgtggtttgtac**ggcactgtggccacgtcca**aaaccacac**  
**tgtggtttag**agcaggggtatgggaggcaccgatgagcctggccctgggaggccacctggagaagcaacacacacacacacacacaca  
cacacacacacacacaccgtctagggattgtgatgaagtcttgcaaggtgggacaggagacactggaaagagcccctctgcaacccccag  
gtgtctgataaccagttatcaggaac

ID#19-F1-Mouse-ID#19, #23, #25:

tttctggttctgattgtccccccccagctttttggggggccatgttgccattcacacctgtctcactctaggtgggggtcttcacggcactg  
cctgtgtgtcttctctcgaccaccccagctctgccccgccc**cagcagcactgtggtttgtac**ggcactgtggccacgtcca**aaaccacac**  
**tgtggtttag**agcaggggtatgggaggcaccgatgagcctggccctgggaggccacctggagaagcaacacacacacacacacacaca  
cacacacacacacacaccgtctagggattgtgatgaagtcttgcaaggtgggacaggagacactggaaagagcccctctgcaacccccag  
gtgtctgataaccagttatcaggaacct

**Relevant Reagents**

|                               |                                                                                                              |
|-------------------------------|--------------------------------------------------------------------------------------------------------------|
| Water                         | Sigma, Cat. No. W1503                                                                                        |
| EDTA                          | Sigma, Cat. No. E7889                                                                                        |
| Trizma Hydrochloride Solution | Sigma, Cat. No. T2663                                                                                        |
| Proteinase K                  | Merck, Cat. No. MK539480                                                                                     |
| Taq DNA Polymerase            | Takara, Cat. No. R007                                                                                        |
| dNTP                          | Takara, Cat. No. 4030                                                                                        |
| Agarose                       | Biowest Agarose, Regular                                                                                     |
| DNA Marker                    | FermentasGeneRuler™ 100bp DNA Ladder #SM0241                                                                 |
| 0.5×TBE                       | Tris Bio Basic Inc, TBO194-500g<br>EDTA Shanghai Sangon, 0105-500g<br>Boric Acid, Shanghai Sangon, 0588-500g |

**Table S4. Antibodies used in the present study.**

| Target         | Company                   | Catalog number | Dilution       |
|----------------|---------------------------|----------------|----------------|
| ITGB1          | Cell Signaling Technology | #34971         | 1:1000 (WB)    |
| FAK            | Cell Signaling Technology | #3285          | 1:1000 (WB)    |
| pY397-FAK      | Cell Signaling Technology | #3281          | 1:1000 (WB)    |
| CDC42          | Abcam                     | #ab187643      | 1:5000 (WB)    |
| Paxillin       | Abcam                     | #ab32084       | 1:5000 (WB)    |
| pY118-Paxillin | Abcam                     | #ab109547      | 1:1000 (WB)    |
| AKT            | Proteintech               | #10176-2-AP    | 1:2000 (WB)    |
| pS473-AKT      | Proteintech               | #66444-1-IG    | 1:2000 (WB)    |
| GAPDH          | Santa Cruz Biotechnology  | #sc-47724      | 1:1000 (WB)    |
| pY397-FAK      | Abcam                     | #ab81298       | 1:1000 (IF)    |
| pY118-Paxillin | Abcam                     | #ab109547      | 1:1000 (IF)    |
| CDC42          | Proteintech               | 10155-1-AP     | 1:50-500 (IHC) |

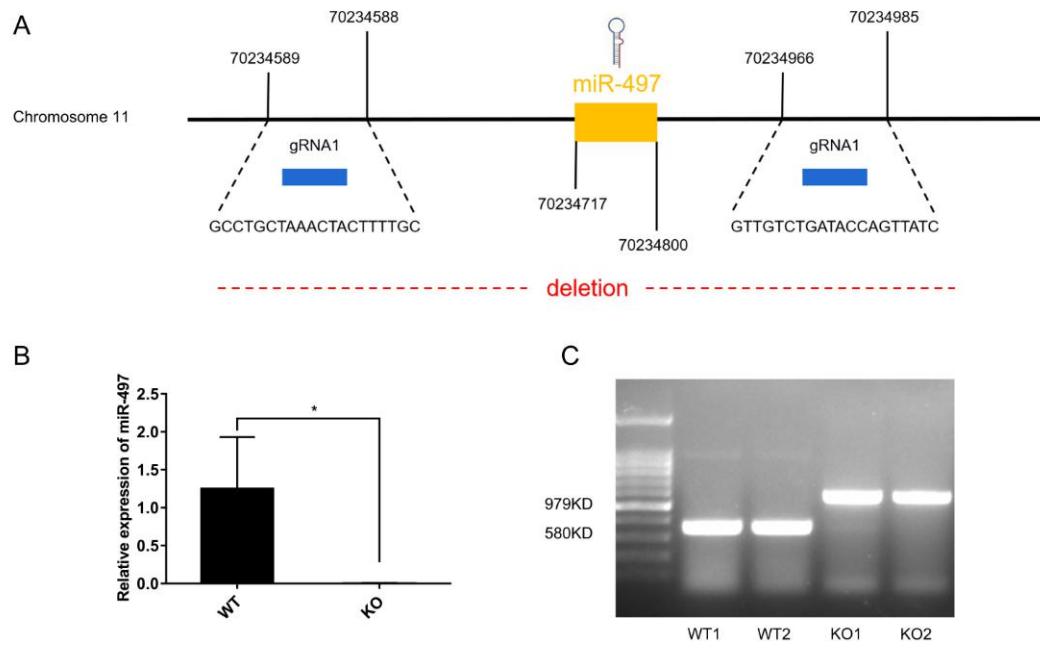

**Supplementary Figure 1. The generation of miR-497 knockout mice.**

(A) The schematic representation of generation of miR-497 knockout mice. (B) qPCR was used to validate the efficiency of miR-497 knockout. (C) Southern blot of genomic DNA from mice of the indicated genotypes; WT band, 979 kb; disrupted band, 580 kb. ( $P < 0.05$ ).

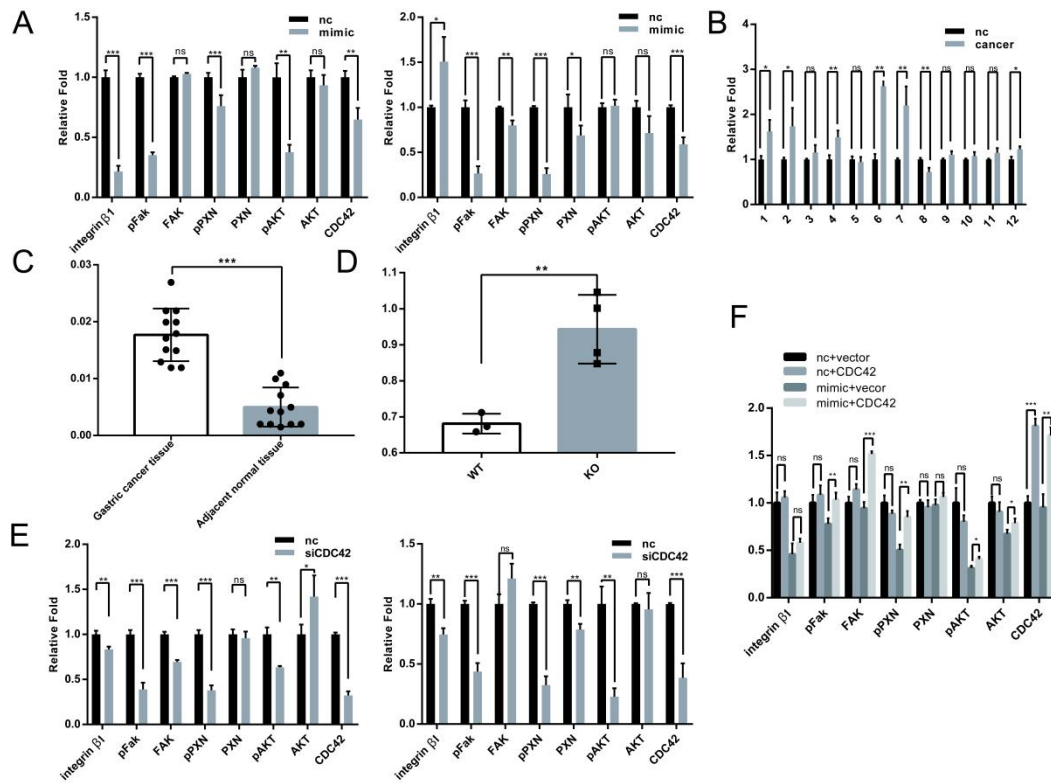

**Supplementary Figure 2. The quantification of the experimental results of Western blotting and IHC.**

(A) Western blot was used to detect the effect of miR-497 transfection in AGS (left) and HGC (right) cells on CDC42/ITGB1/FAK/PXN/AKT pathway. (B) Quantitation of CDC42 expression in GC tissues / para-carcinoma tissues, which was detected by Western blot. (C) Quantitation of the IHC staining of CDC42 in GC tissues / para-carcinoma tissues, indicating that the expression of CDC42 was up-regulated in GC tissues. (D) Quantitation of CDC42 expression in the gastric tissues of miR-497<sup>-/-</sup> mice (n=4) and WT mice (n=3), which was detected by Western blot. (E) Western blotting was used to detect the change of CDC42/ITGB1/FAK/PXN/AKT pathway in AGS (left) and HGC (right) cells, after CDC42 was depleted. (F) Western blot was used to detect the effect of CDC42 and miR-497 on CDC42/ITGB1/FAK/PXN/AKT pathway (ns, no significance; \*,  $P < 0.05$ ; \*\*,  $P < 0.01$ ; \*\*\*,  $P < 0.001$ ).
